# Supplementary material for: Regulatory impairment in untreated Parkinson’s disease is not restricted to Tregs: other regulatory populations are also involved
Source: PubMed Central journal article supplement (PMC6849192; doi:10.1186/s12974-019-1606-1), 2019-11-11
Supplement: 12974_2019_1606_MOESM3_ESM.pdf [file 12974_2019_1606_MOESM3_ESM.pdf]

Supplementary Figure 2. Gating strategies for Tregs, CD8regs, Bregs, monocytes, DCs, and T helper cells. **A.** CD4 regulatory T cells. The cells were characterized by a CD4 vs. size dot plot (FSC), where a region R1 was generated by selecting CD4<sup>+</sup> cells only. A second CD25 vs. FOXP3 dot plot was generated from R1. Cells with phenotype CD4<sup>+</sup>CD25<sup>hi</sup>FOXP3<sup>+</sup> were termed as classical Tregs. A CD45RO vs. FOXP3 dot plot was also generated from R1; CD4<sup>+</sup>CD45RO<sup>+</sup>FOXP3<sup>hi</sup> cells were termed as active Tregs, CD4<sup>+</sup>CD45RO<sup>+</sup>FOXP3<sup>med</sup> cells were called non-Tregs, and CD4<sup>+</sup>CD45RO<sup>-</sup>FOXP3<sup>low</sup> cells were named as resting Tregs. On the other hand, another FSC vs. dispersion dot plot (SSC) was generated, selecting a lymphocyte-only region labeled as R1. A CD4 vs. CD25 dot plot was generated from R1, selecting only CD4<sup>+</sup>CD25<sup>hi</sup> cells in a region named as R3. A FOXP3 vs. CD127 dot plot was generated, and CD4<sup>+</sup>CD25<sup>hi</sup>FOXP3<sup>+</sup>CD127<sup>-</sup> cells were termed as suppressive Tregs. Finally, the cells were characterized by a CD4 vs. size dot plot (FSC), where a region R1 was generated by selecting CD4<sup>+</sup> cells only. A CD25 vs. IL-10 dot plot was also generated from R1; CD4<sup>+</sup>CD25<sup>hi</sup>IL-10<sup>+</sup> cells were termed as Tr1 cells. A CD25 vs. TGF- $\beta$  dot plot was generated from the same R1 region, and CD4<sup>+</sup>CD25<sup>hi</sup>TGF- $\beta$ <sup>+</sup> cells were named as Th3. **B.** CD8 regulatory T cells. labeling, a CD8 vs. FSC dot plot was generated, defining a region of CD8<sup>+</sup> cells only, named as R1. A CD56 vs. CD161 dot plot was generated from R1; CD8<sup>+</sup>CD56<sup>+</sup>CD161<sup>-</sup> were regarded as cytolytic CD8regs. A CD28 vs. FOXP3 dot plot was derived from R1; CD8<sup>+</sup>CD28<sup>-</sup>FOXP3<sup>+</sup> cells were termed as CD8regs. On the other hand, a lymphocyte region in an FSC vs. SSC dot plot was named as R1. A CD8 vs. IL-10 dot plot was generated from R1, selecting a region of CD8<sup>+</sup>IL-10<sup>+</sup> cells only, termed as R3. A CCR7 vs. CD45RO dot plot was generated from R3; CD8<sup>+</sup>IL-10<sup>+</sup>CCR7<sup>+</sup>CD45RO<sup>+</sup> cells were regarded as functional CD8regs. **C.** B regulatory cells. An FSC vs. SSC dot plot was generated, selecting a region named as R1. A CD19 vs. CD138 dot plot was derived from R1; CD19<sup>-</sup>CD138<sup>+</sup> cells were selected to define the region R2. An IL-10 histogram was generated from R2; CD19<sup>-</sup>CD138<sup>+</sup>IL-10<sup>+</sup> cells were termed as IL-10-producing plasma cells. Another phenotype was defined from a CD19 vs. FSC dot plot, a CD19<sup>+</sup> cell region was labeled as R1. A CD38 vs. CD24 dot plot was generated from R1; CD38<sup>hi</sup>CD24<sup>hi</sup> cells were selected, generating the region R3. An IL-10 histogram was generated, and CD19<sup>+</sup>CD38<sup>hi</sup>CD24<sup>hi</sup>IL-10<sup>+</sup> were defined as functional Bregs. A CD5 vs. CD1d dot plot was then generated from R1; CD5<sup>+</sup>CD1d<sup>+</sup> cells defined a new region termed as R7. A FOXP3 vs. IL-10 dot plot was generated from R7; CD19<sup>+</sup>CD5<sup>+</sup>CD1d<sup>+</sup>FOXP3<sup>+</sup>IL-10<sup>+</sup> cells were termed as Bregs.

**D. Monocytes.** An FSC vs. SSC dot plot was generated, and a region named as R1 was defined. A CD14 vs. CD16 dot plot was derived from R1, and three regions were defined in this plot: R2, including CD14<sup>low</sup>CD16<sup>hi</sup> cells, also known as non-classical monocytes; R3, representing CD14<sup>hi</sup>CD16<sup>+</sup> cells, termed as intermediate monocytes; and R4, comprising CD14<sup>hi</sup>CD16<sup>-</sup> cells, named as classical monocytes. A histogram was generated from each of these three monocyte phenotypes to determine IL-10<sup>-</sup>, IL-12<sup>-</sup> or HLA-DR<sup>-</sup> positive cells. In a further analysis, two regions were defined from R1: R5, including CD14<sup>hi</sup>CD16<sup>hi</sup> cells, and R6, representing CD14<sup>hi</sup>CD16<sup>low</sup> cells. A CD163 vs. HLA-DR dot plot was derived from R5, defining a region of CD163<sup>low</sup>HLA-DR<sup>hi</sup> cells, labeled as R11. An IL-12 histogram was generated from R11, obtaining CD14<sup>hi</sup>CD16<sup>hi</sup>CD163<sup>low</sup>HLA-DR<sup>hi</sup>IL-12<sup>+</sup> cells, termed as M1-like monocytes. Starting from R6, a CD163 vs. HLA-DR dot plot was generated and the CD163<sup>hi</sup>HLA-DR<sup>low</sup> cells were selected, to define the region R16. An IL-10 histogram was generated from R16, obtaining CD14<sup>hi</sup>CD16<sup>low</sup>CD163<sup>hi</sup>HLA-DR<sup>low</sup>IL-10<sup>+</sup> cells, named as M2-like monocytes.

**E. Dendritic cells.** An FSC vs. SSC dot plot was generated, and a dendritic region was termed as R1. Several dot plots were derived from R1: 1) CD11c vs. PD-L1; 2) CD11c vs. SLAMF7; 3) CD11c vs. ILT3; 4) CD11c vs. CD205; 5) CD11c vs. HLA-DR; 6) CD11c vs. CD40; 7) CD11c vs. CD80; and 8) CD11c vs. CD86. CD11c<sup>+</sup>PD-L1<sup>+</sup>, CD11c<sup>+</sup>SLAMF7<sup>+</sup>, CD11c<sup>+</sup>ILT3<sup>+</sup>, and CD11c<sup>+</sup>CD205<sup>+</sup> cells were labeled as tolerogenic DCs. CD11c<sup>+</sup>HLA-DR<sup>+</sup>, CD11c<sup>+</sup>CD40<sup>+</sup>, CD11c<sup>+</sup>CD80<sup>+</sup>, and CD11c<sup>+</sup>CD86<sup>+</sup> cells were regarded as active DCs.

**F. T helper cells.** Th1: To characterize these cells, a CD4 vs. FSC dot plot was generated; CD4<sup>+</sup> cells were selected to form the region R1. Tbet vs. IFN- $\gamma$  and Tbet vs. TNF- $\alpha$  dot plots were generated from R1 and two phenotypes were defined: CD4<sup>+</sup>Tbet<sup>+</sup>IFN- $\gamma$ <sup>+</sup> cells, named as Th1-IFN- $\gamma$  cells, and CD4<sup>+</sup>Tbet<sup>+</sup>TNF- $\alpha$ <sup>+</sup> cells, named as Th1-TNF- $\alpha$  cells. Th2 cells: To characterize these cells, a CD4 vs. FSC dot plot was generated; CD4<sup>+</sup> cells were selected in the plot to form the region R1. GATA-3 vs. IL-13 and GATA-3 vs. IL-4 dot plots were generated from R1 to define two phenotypes: CD4<sup>+</sup>GATA-3<sup>+</sup>IL-4<sup>+</sup> cells, termed as Th2-IL-4 cells, and CD4<sup>+</sup>GATA-3<sup>+</sup>IL-13<sup>+</sup> cells, named as Th2-IL-13 cells. Th17 cells: To characterize these cells, a CD4 vs. FSC dot plot was generated; CD4<sup>+</sup> cells were selected in the plot to form the region R1. ROR- $\gamma$  vs. IL-17 $\alpha$  dot plot was generated from R1, thus defining the phenotype: CD4<sup>+</sup>ROR- $\gamma$ <sup>+</sup>IL-17 $\alpha$ <sup>+</sup> termed as Th17-IL-17 $\alpha$  cells.

# A) CD4 regulatory T cells

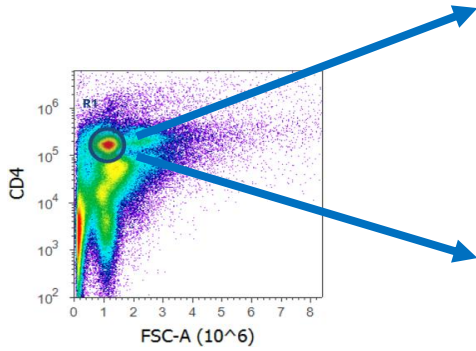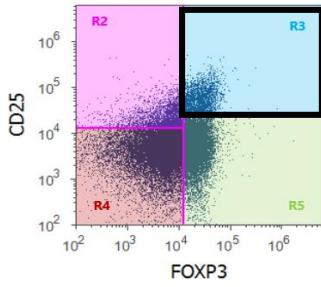

Classical Tregs  
CD4+CD25<sup>hi</sup>FOXP3+

Non-Tregs  
CD4+CD45RO+FOXP3<sup>med</sup>

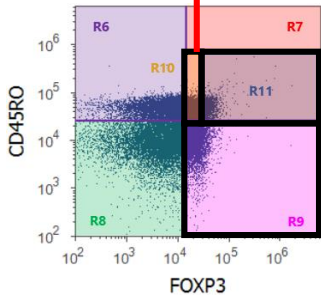

Active Tregs cells  
CD4+CD45RO+FOXP3<sup>hi</sup>

Resting Tregs  
CD4+CD45RO-FOXP3<sup>low</sup>

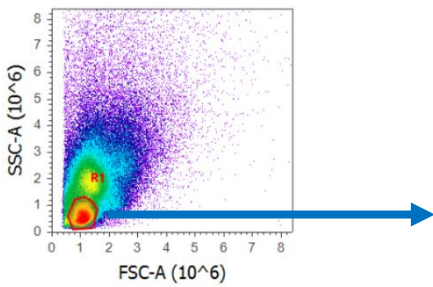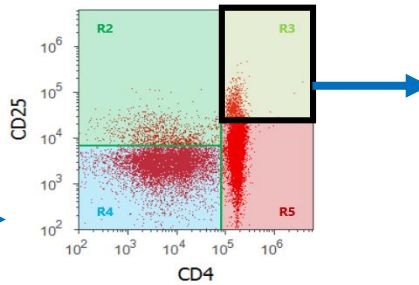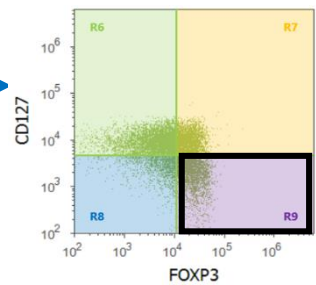

Suppressive Tregs  
CD4+CD25<sup>hi</sup>FOXP3+CD127-

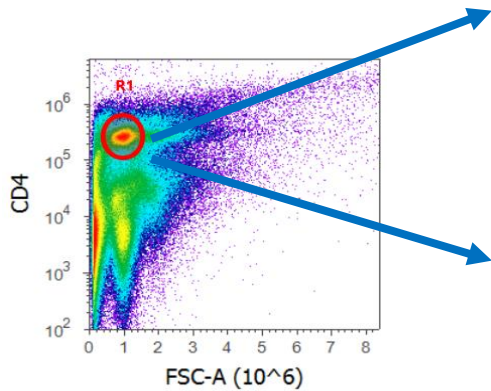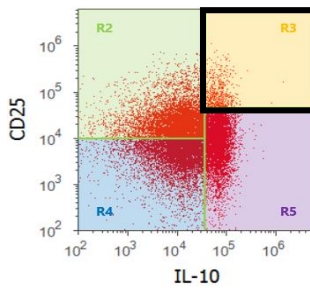

Tr1  
CD4+CD25<sup>hi</sup>IL-10+

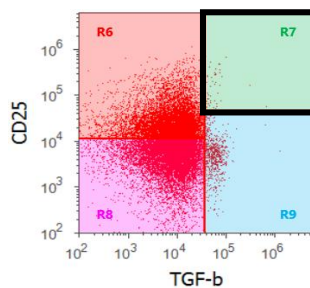

Th3  
CD4+CD25<sup>hi</sup>TGF- $\beta$ +

# B) CD8 regulatory T cells

Cytolytic CD8regs  
CD8+CD56+CD161-

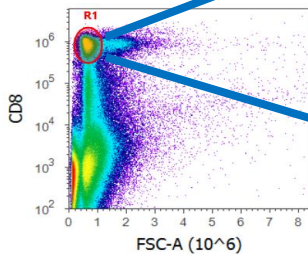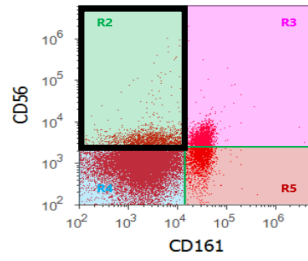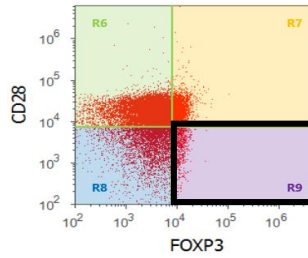

CD8regs  
CD8+CD28-FOXP3+

Functional CD8regs  
CD8+CD45RO+CCR7+IL-10+

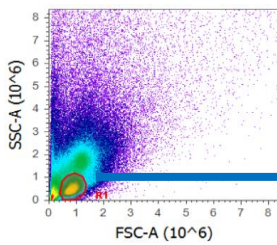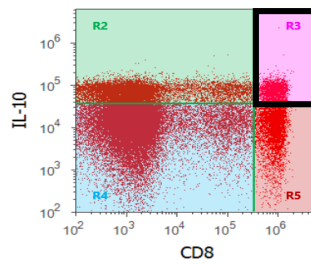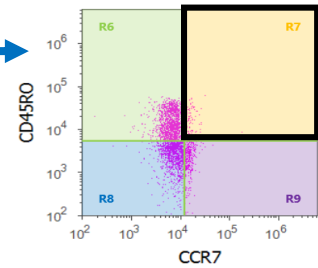

# C) B regulatory cells

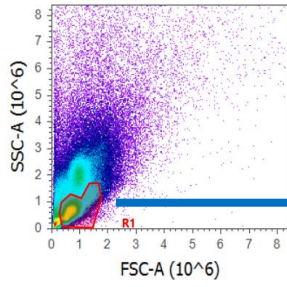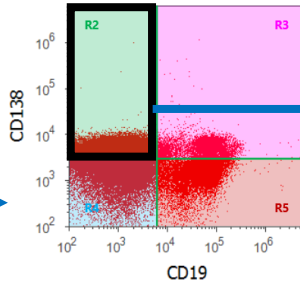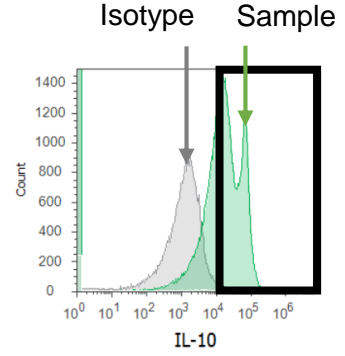

IL-10-producing plasma cells  
CD19-CD138+IL-10+

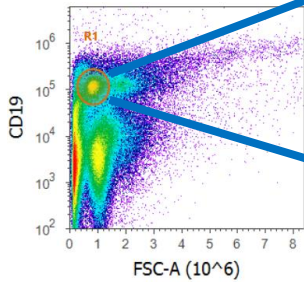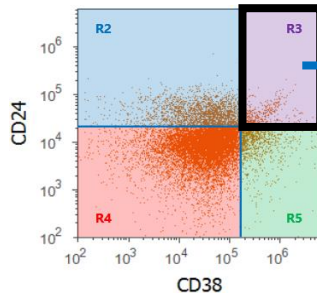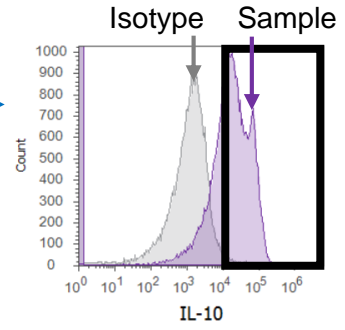

Functional Bregs  
CD19+CD38<sup>hi</sup>CD24<sup>hi</sup>IL-10+

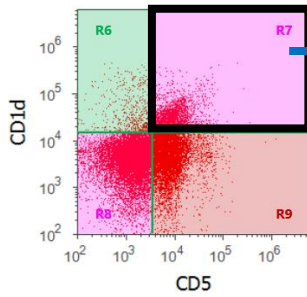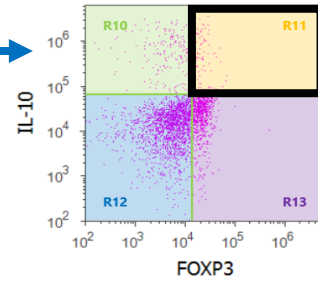

Bregs  
CD19+CD5+CD1d+FOXP3+IL-10+

# D) Monocytes

Non-classical monocytes  
CD14<sup>low</sup>CD16<sup>hi</sup>

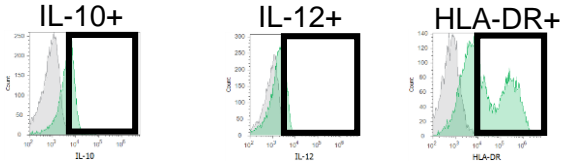

Isotype

Sample

Intermediate monocytes  
CD14<sup>hi</sup>CD16<sup>+</sup>

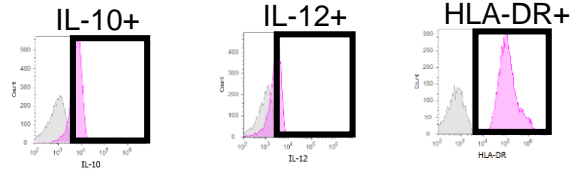

Classical monocytes  
CD14<sup>hi</sup>CD16<sup>-</sup>

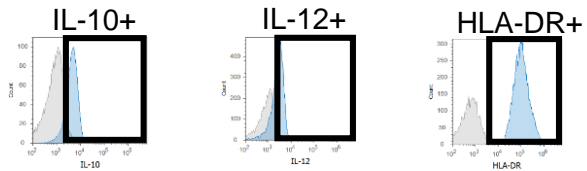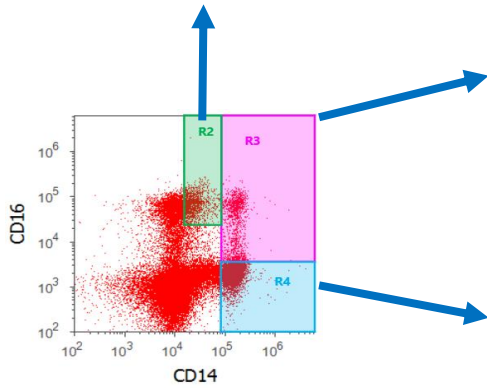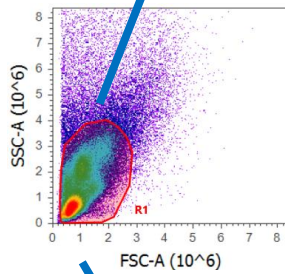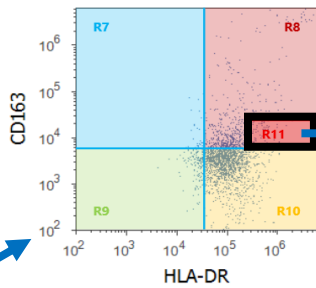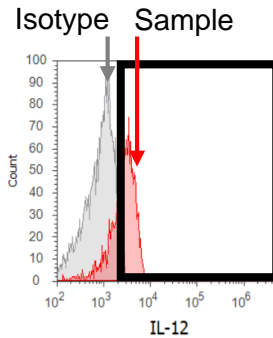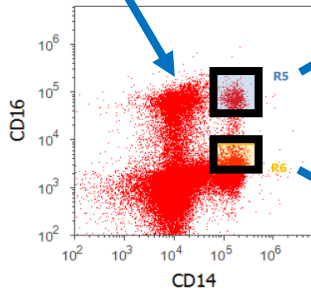

M1-like monocytes  
CD14<sup>hi</sup>CD16<sup>hi</sup>CD163<sup>low</sup>HLA-DR<sup>hi</sup>IL-12<sup>+</sup>

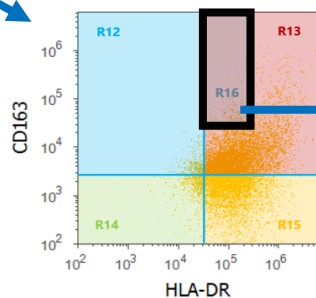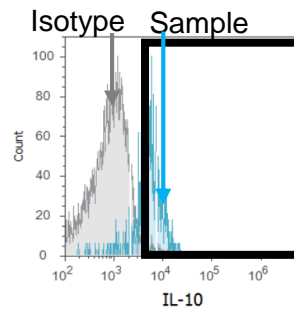

M2-like monocytes  
CD14<sup>hi</sup>CD16<sup>low</sup>CD163<sup>hi</sup>HLA-DR<sup>low</sup>IL-10<sup>+</sup>

# E) Dendritic cells

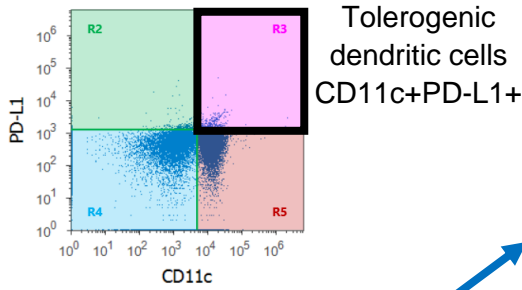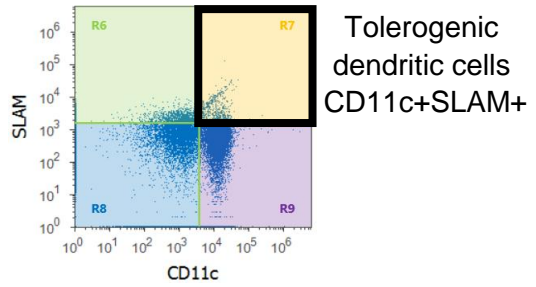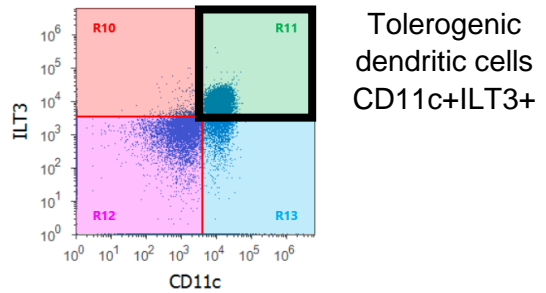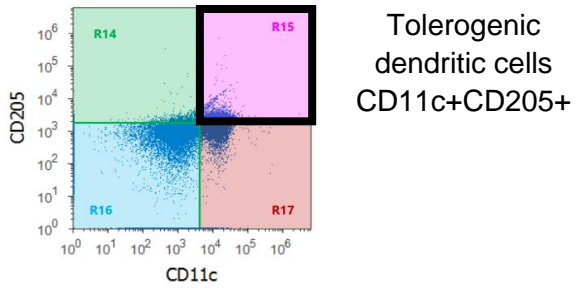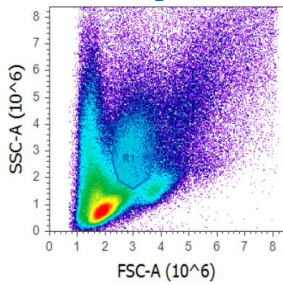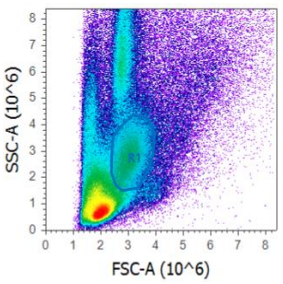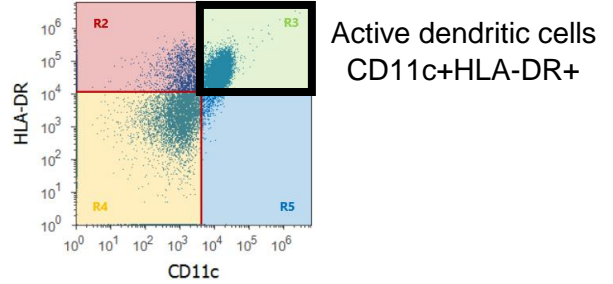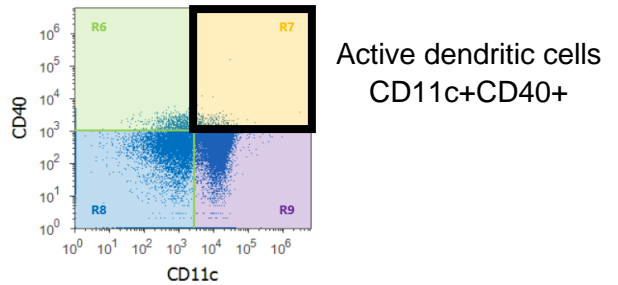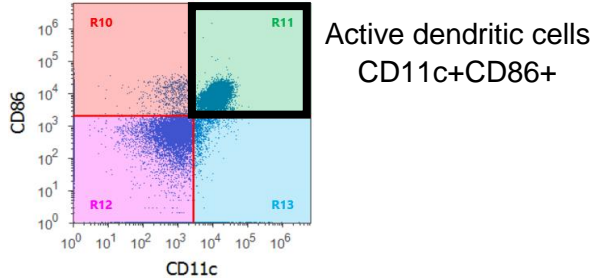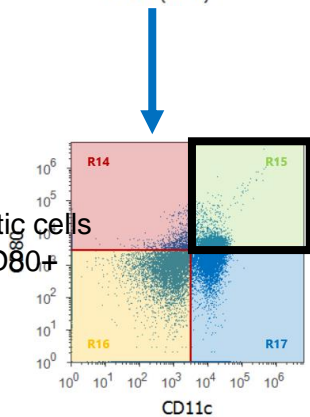

Active dendritic cells  
CD11c+CD80+

# F) T helper cells

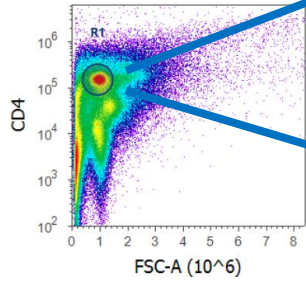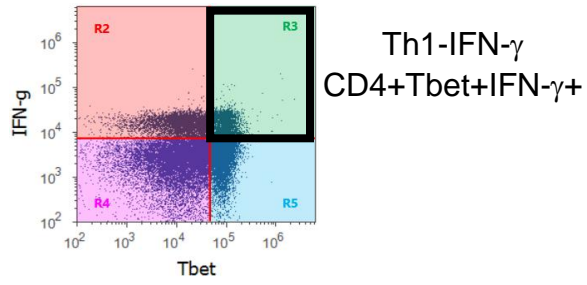

Th1-IFN- $\gamma$   
CD4+Tbet+IFN- $\gamma$ +

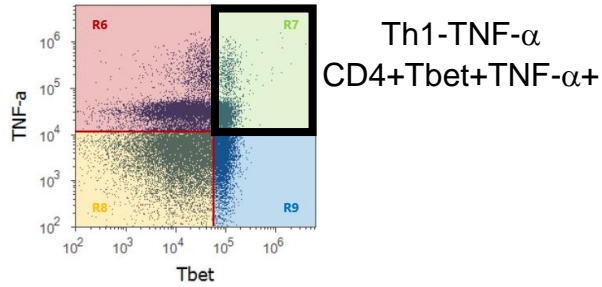

Th1-TNF- $\alpha$   
CD4+Tbet+TNF- $\alpha$ +

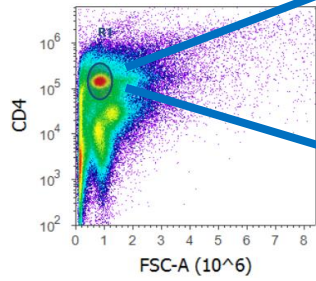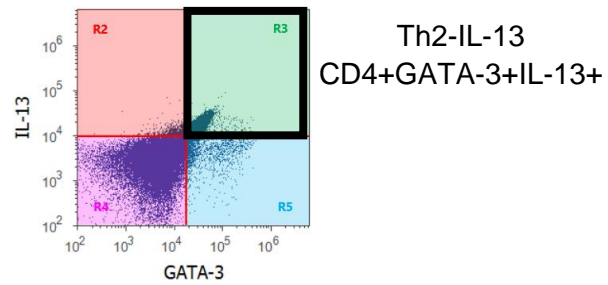

Th2-IL-13  
CD4+GATA-3+IL-13+

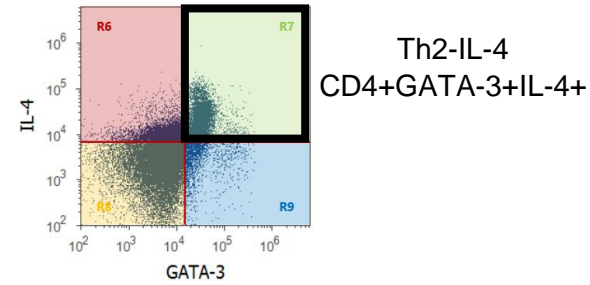

Th2-IL-4  
CD4+GATA-3+IL-4+

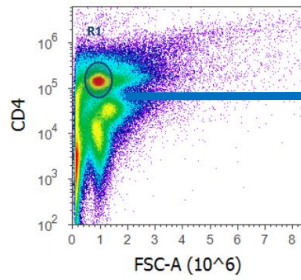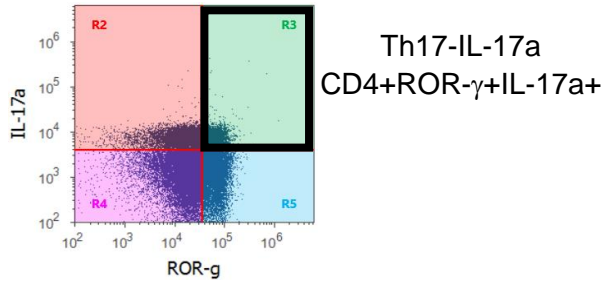

Th17-IL-17a  
CD4+ROR- $\gamma$ +IL-17a+
